# Supplementary material for: Real-world evidence with a retrospective cohort of 15,968 Andalusian COVID-19 hospitalized patients suggests 21 new effective treatments and one drug that increases death risk
Source: bioRxiv or medRxiv preprint supplement (doi:10.1101/2022.08.14.22278751), 2022-08-16
Supplement: Supplementary file [file media-1.pdf]

**Supplementary Table 1.** Data imported from BPS for each patient: code and definition of the variable.

| <b>Code</b>                                   | <b>Meaning</b>                                                                                                           |
|-----------------------------------------------|--------------------------------------------------------------------------------------------------------------------------|
| FECNAC                                        | Birth date                                                                                                               |
| FECDEF                                        | Death date                                                                                                               |
| SEXO                                          | Gender                                                                                                                   |
| FEC_INGRESO                                   | Hospital admission date                                                                                                  |
| FEC_ALTA                                      | Discharge date                                                                                                           |
| MOTIVO_ALTA                                   | Reason for the discharge: (recovery/death/admission in another hospital/voluntary discharge/retirement home/unspecified) |
| COD_PATOLOGIA_CRONICA                         | Hospital codes for chronic conditions                                                                                    |
| COD_FEC_INI_PATOLOGIA                         | Date of condition diagnosis                                                                                              |
| COD_CIE_NORMALIZADO                           | A mixture of ICD9 and ICD10 codes for diseases                                                                           |
| DESC_CIE_NORMALIZADO                          | Description of the ICD                                                                                                   |
| FECINI_DIAG                                   | Diagnosis date                                                                                                           |
| FECFIN_DIAG                                   | End of the diagnosed condition                                                                                           |
| FUENTE_DIAG                                   | Source of the diagnosis (hospital, emergency, etc.)                                                                      |
| IND_CRONICO_HCUP                              | Is a chronic disease? (yes/no)                                                                                           |
| Test COVID: FECHA                             | Test COVID date                                                                                                          |
| Test COVID: TYPE                              | PCR / antigens                                                                                                           |
| Test COVID:                                   | Result of the test (positive/negative)                                                                                   |
| RESULTADO_TEST                                |                                                                                                                          |
| Pharmacy (Hospital and external): DESCRIPCION | List of drugs used in hospital or purchased in the pharmacies                                                            |
| Pharmacy (Hospital and external): FECHA       | Dispensing date                                                                                                          |
| VACUNA                                        | List of vaccines                                                                                                         |
| VACUNAFECHA                                   | Vaccination dates                                                                                                        |
| COD_CLC                                       | List of analytical tests                                                                                                 |
| FEC_EXTRAE                                    | Analytic test date                                                                                                       |
| VALOR                                         | Analytic test value                                                                                                      |
