# Supplementary material for: Real-world evidence with a retrospective cohort of 15,968 Andalusian COVID-19 hospitalized patients suggests 21 new effective treatments and one drug that increases death risk
Source: bioRxiv or medRxiv preprint supplement (doi:10.1101/2022.08.14.22278751), 2022-08-16
Supplement: Supplementary file [file media-2.pdf]

**Supplementary Table 2.** Log Hazard ratios obtained for the drugs tested, along with standard deviations (SDs), upper and lower coefficient intervals (CI), nominal and FDR-adjusted p-values. Also, Lymphocyte proliferation values (see Methods) along with standard deviations (SDs), upper and lower coefficient intervals (CI), nominal and FDR-adjusted p-values. The two last columns indicate the drugs used in the machine learning drug repurposing prediction study and the significance of the prediction.

| Drugbank ID | Name                 | N    | LHR estimate | LHR SD | LHR CI 5% | LHR CI 95% | LHR p-value | LHR FDR p-value | Lymphocyte proliferation | Lymphocyte Prol. CI 5% | Lymphocyte Prol. CI 95% | Lymphocyte Prol. p-value | Lymphocyte Prol. FDR p-value | Target  | ML Prediction tested | ML Prediction significant |
|-------------|----------------------|------|--------------|--------|-----------|------------|-------------|-----------------|--------------------------|------------------------|-------------------------|--------------------------|------------------------------|---------|----------------------|---------------------------|
| DB01225     | Enoxaparin           | 3237 | -1.2092      | 0.1032 | -1.4114   | -1.0070    | 0.00E+00    | 0.00E+00        | 11.3107                  | 0.0123                 | 0.0175                  | 5.06E-29                 | 6.18E-27                     |         | Yes                  | No                        |
| DB09258     | Bemiparin            | 1347 | -1.4845      | 0.1686 | -1.8149   | -1.1540    | 0.00E+00    | 0.00E+00        | 6.1915                   | 0.0099                 | 0.0191                  | 8.87E-10                 | 2.70E-08                     |         | Yes                  | No                        |
| DB01234     | Dexamethasone        | 2469 | -0.7568      | 0.1027 | -0.9581   | -0.5554    | 1.75E-13    | 7.11E-12        | 9.4279                   | 0.0123                 | 0.0188                  | 1.23E-20                 | 7.53E-19                     | NR1I2   | Yes                  | Yes                       |
| DB00316     | Acetaminophen        | 7258 | -0.2757      | 0.0403 | -0.3548   | -0.1967    | 8.25E-12    | 2.52E-10        | 6.5357                   | 0.0036                 | 0.0067                  | 6.80E-11                 | 2.77E-09                     | PTGS2   | Yes                  | Yes                       |
| DB00999     | Hydrochlorothiazide  | 2197 | -0.3515      | 0.0604 | -0.4698   | -0.2332    | 5.78E-09    | 1.41E-07        | 3.9805                   | 0.0027                 | 0.0080                  | 0.0001                   | 0.0007                       | KCNMA1  | Yes                  | Yes                       |
| DB00641     | Simvastatin          | 1588 | -0.4056      | 0.0703 | -0.5433   | -0.2679    | 7.79E-09    | 1.58E-07        | 5.1663                   | 0.0052                 | 0.0116                  | 2.71E-07                 | 5.51E-06                     | ITGB2   | Yes                  | Yes                       |
| DB00641     | Simvastatin          | 1588 | -0.4056      | 0.0703 | -0.5433   | -0.2679    | 7.79E-09    | 1.58E-07        | 5.1663                   | 0.0052                 | 0.0116                  | 2.71E-07                 | 5.51E-06                     | ITGAL   | Yes                  | Yes                       |
| DB00331     | Metformin            | 1896 | -0.3565      | 0.0673 | -0.4884   | -0.2245    | 1.19E-07    | 2.08E-06        | 3.8874                   | 0.0027                 | 0.0083                  | 0.0001                   | 0.0007                       | GPD1    | Yes                  | Yes                       |
| DB00338     | Omeprazole           | 5173 | -0.2037      | 0.0435 | -0.2890   | -0.1185    | 2.81E-06    | 4.29E-05        | 3.9230                   | 0.0019                 | 0.0057                  | 0.0001                   | 0.0007                       |         | Yes                  | No                        |
| DB00695     | Furosemide           | 1920 | 0.2413       | 0.0521 | 0.1392    | 0.3435     | 3.66E-06    | 4.96E-05        | -3.7433                  | -0.0081                | -0.0025                 | 0.0002                   | 0.0010                       |         | Yes                  | No                        |
| DB00635     | Prednisone           | 1818 | -0.3598      | 0.0833 | -0.5231   | -0.1965    | 1.57E-05    | 0.0002          | 5.4336                   | 0.0064                 | 0.0137                  | 6.41E-08                 | 1.56E-06                     |         | Yes                  | No                        |
| DB00983     | Formoterol           | 1380 | -0.3704      | 0.0860 | -0.5389   | -0.2019    | 1.64E-05    | 0.0002          | 5.1358                   | 0.0065                 | 0.0145                  | 3.25E-07                 | 5.66E-06                     |         | Yes                  | No                        |
| DB01611     | Hydroxychloroquine   | 320  | -1.1799      | 0.3163 | -1.7999   | -0.5599    | 0.0002      | 0.0019          | -0.2891                  | -0.0096                | 0.0073                  | 0.7729                   | 0.8129                       | TLR7    | Yes                  | Yes                       |
| DB00381     | Amlodipine           | 1250 | -0.2709      | 0.0729 | -0.4138   | -0.1280    | 0.0002      | 0.0019          | 1.8484                   | -0.0002                | 0.0067                  | 0.0648                   | 0.1444                       | CACNA1B | Yes                  | Yes                       |
| DB00381     | Amlodipine           | 1250 | -0.2709      | 0.0729 | -0.4138   | -0.1280    | 0.0002      | 0.0019          | 1.8484                   | -0.0002                | 0.0067                  | 0.0648                   | 0.1444                       | CACNG1  | Yes                  | Yes                       |
| DB00945     | Acetylsalicylic acid | 2127 | -0.1954      | 0.0555 | -0.3042   | -0.0867    | 0.0004      | 0.0037          | 1.4022                   | -0.0008                | 0.0048                  | 0.1610                   | 0.3070                       | MYC     | Yes                  | Yes                       |
| DB00945     | Acetylsalicylic acid | 2127 | -0.1954      | 0.0555 | -0.3042   | -0.0867    | 0.0004      | 0.0037          | 1.4022                   | -0.0008                | 0.0048                  | 0.1610                   | 0.3070                       | NFKBIA  | Yes                  | Yes                       |
| DB00945     | Acetylsalicylic acid | 2127 | -0.1954      | 0.0555 | -0.3042   | -0.0867    | 0.0004      | 0.0037          | 1.4022                   | -0.0008                | 0.0048                  | 0.1610                   | 0.3070                       | CASP1   | Yes                  | Yes                       |
| DB00945     | Acetylsalicylic acid | 2127 | -0.1954      | 0.0555 | -0.3042   | -0.0867    | 0.0004      | 0.0037          | 1.4022                   | -0.0008                | 0.0048                  | 0.1610                   | 0.3070                       | IKBKB   | Yes                  | Yes                       |
| DB00945     | Acetylsalicylic acid | 2127 | -0.1954      | 0.0555 | -0.3042   | -0.0867    | 0.0004      | 0.0037          | 1.4022                   | -0.0008                | 0.0048                  | 0.1610                   | 0.3070                       | CCND1   | Yes                  | Yes                       |
| DB00945     | Acetylsalicylic acid | 2127 | -0.1954      | 0.0555 | -0.3042   | -0.0867    | 0.0004      | 0.0037          | 1.4022                   | -0.0008                | 0.0048                  | 0.1610                   | 0.3070                       | PTGS2   | Yes                  | Yes                       |
| DB00945     | Acetylsalicylic acid | 2127 | -0.1954      | 0.0555 | -0.3042   | -0.0867    | 0.0004      | 0.0037          | 1.4022                   | -0.0008                | 0.0048                  | 0.1610                   | 0.3070                       | RPS6KA3 | Yes                  | Yes                       |

|         |                             |      |         |        |         |         |        |        |        |         |        |          |        |        |     |     |
|---------|-----------------------------|------|---------|--------|---------|---------|--------|--------|--------|---------|--------|----------|--------|--------|-----|-----|
| DB00829 | Diazepam                    | 641  | -0.4167 | 0.1211 | -0.6541 | -0.1793 | 0.0006 | 0.0047 | 2.1643 | 0.0006  | 0.0114 | 0.0308   | 0.0753 | GABRA2 | Yes | Yes |
| DB00829 | Diazepam                    | 641  | -0.4167 | 0.1211 | -0.6541 | -0.1793 | 0.0006 | 0.0047 | 2.1643 | 0.0006  | 0.0114 | 0.0308   | 0.0753 | GABRA5 | Yes | Yes |
| DB00829 | Diazepam                    | 641  | -0.4167 | 0.1211 | -0.6541 | -0.1793 | 0.0006 | 0.0047 | 2.1643 | 0.0006  | 0.0114 | 0.0308   | 0.0753 | GABRD  | Yes | Yes |
| DB00394 | Beclomethasone dipropionate | 792  | -0.3690 | 0.1132 | -0.5909 | -0.1472 | 0.0011 | 0.0085 | 4.1539 | 0.0059  | 0.0166 | 3.65E-05 | 0.0004 |        | Yes | No  |
| DB01050 | Ibuprofen                   | 519  | -0.6596 | 0.2081 | -1.0674 | -0.2518 | 0.0015 | 0.0109 | 2.1828 | 0.0008  | 0.0150 | 0.0296   | 0.0737 | BCL2   | Yes | Yes |
| DB01050 | Ibuprofen                   | 519  | -0.6596 | 0.2081 | -1.0674 | -0.2518 | 0.0015 | 0.0109 | 2.1828 | 0.0008  | 0.0150 | 0.0296   | 0.0737 | PPARG  | Yes | Yes |
| DB01050 | Ibuprofen                   | 519  | -0.6596 | 0.2081 | -1.0674 | -0.2518 | 0.0015 | 0.0109 | 2.1828 | 0.0008  | 0.0150 | 0.0296   | 0.0737 | CFTR   | Yes | Yes |
| DB01050 | Ibuprofen                   | 519  | -0.6596 | 0.2081 | -1.0674 | -0.2518 | 0.0015 | 0.0109 | 2.1828 | 0.0008  | 0.0150 | 0.0296   | 0.0737 | PTGS2  | Yes | Yes |
| DB00126 | Ascorbic acid               | 840  | -0.3332 | 0.1067 | -0.5424 | -0.1240 | 0.0018 | 0.0122 | 3.6668 | 0.0041  | 0.0134 | 0.0003   | 0.0013 | TMLHE  | Yes | Yes |
| DB00126 | Ascorbic acid               | 840  | -0.3332 | 0.1067 | -0.5424 | -0.1240 | 0.0018 | 0.0122 | 3.6668 | 0.0041  | 0.0134 | 0.0003   | 0.0013 | P3H1   | Yes | Yes |
| DB00126 | Ascorbic acid               | 840  | -0.3332 | 0.1067 | -0.5424 | -0.1240 | 0.0018 | 0.0122 | 3.6668 | 0.0041  | 0.0134 | 0.0003   | 0.0013 | P4HTM  | Yes | Yes |
| DB00126 | Ascorbic acid               | 840  | -0.3332 | 0.1067 | -0.5424 | -0.1240 | 0.0018 | 0.0122 | 3.6668 | 0.0041  | 0.0134 | 0.0003   | 0.0013 | PHYH   | Yes | Yes |
| DB00341 | Cetirizine                  | 233  | -0.7056 | 0.2279 | -1.1522 | -0.2590 | 0.0020 | 0.0125 | 0.9906 | -0.0046 | 0.0141 | 0.3223   | 0.4520 | HRH1   | Yes | Yes |
| DB00318 | Codeine                     | 1019 | -0.2975 | 0.0965 | -0.4865 | -0.1084 | 0.0020 | 0.0125 | 3.9242 | 0.0044  | 0.0132 | 0.0001   | 0.0007 |        | Yes | No  |
| DB00584 | Enalapril                   | 1598 | -0.1996 | 0.0673 | -0.3314 | -0.0678 | 0.0030 | 0.0174 | 3.7605 | 0.0030  | 0.0094 | 0.0002   | 0.0010 |        | Yes | No  |
| DB01261 | Sitagliptin                 | 448  | -0.3651 | 0.1251 | -0.6104 | -0.1198 | 0.0035 | 0.0196 | 2.5602 | 0.0018  | 0.0135 | 0.0108   | 0.0355 | DPP4   | Yes | Yes |
| DB01222 | Budesonide                  | 1047 | -0.2526 | 0.0880 | -0.4251 | -0.0801 | 0.0041 | 0.0217 | 3.2800 | 0.0029  | 0.0115 | 0.0011   | 0.0046 |        | Yes | No  |
| DB00706 | Tamsulosin                  | 1080 | 0.1925  | 0.0677 | 0.0599  | 0.3251  | 0.0044 | 0.0221 | 0.9666 | -0.0019 | 0.0055 | 0.3340   | 0.4630 |        | Yes | No  |
| DB00275 | Olmesartan                  | 413  | -0.3656 | 0.1288 | -0.6180 | -0.1132 | 0.0045 | 0.0221 | 2.3790 | 0.0014  | 0.0142 | 0.0179   | 0.0500 | AGTR1  | Yes | Yes |
| DB01373 | Calcium                     | 641  | -0.3073 | 0.1089 | -0.5208 | -0.0937 | 0.0048 | 0.0225 | 3.7516 | 0.0048  | 0.0153 | 0.0002   | 0.0010 | S100B  | Yes | Yes |
| DB01373 | Calcium                     | 641  | -0.3073 | 0.1089 | -0.5208 | -0.0937 | 0.0048 | 0.0225 | 3.7516 | 0.0048  | 0.0153 | 0.0002   | 0.0010 | ALPP   | Yes | Yes |
| DB01373 | Calcium                     | 641  | -0.3073 | 0.1089 | -0.5208 | -0.0937 | 0.0048 | 0.0225 | 3.7516 | 0.0048  | 0.0153 | 0.0002   | 0.0010 | PDCD6  | Yes | Yes |
| DB01373 | Calcium                     | 641  | -0.3073 | 0.1089 | -0.5208 | -0.0937 | 0.0048 | 0.0225 | 3.7516 | 0.0048  | 0.0153 | 0.0002   | 0.0010 | PCDH19 | Yes | Yes |
| DB01373 | Calcium                     | 641  | -0.3073 | 0.1089 | -0.5208 | -0.0937 | 0.0048 | 0.0225 | 3.7516 | 0.0048  | 0.0153 | 0.0002   | 0.0010 | CAST   | Yes | Yes |
| DB01373 | Calcium                     | 641  | -0.3073 | 0.1089 | -0.5208 | -0.0937 | 0.0048 | 0.0225 | 3.7516 | 0.0048  | 0.0153 | 0.0002   | 0.0010 | S100A8 | Yes | Yes |
| DB01373 | Calcium                     | 641  | -0.3073 | 0.1089 | -0.5208 | -0.0937 | 0.0048 | 0.0225 | 3.7516 | 0.0048  | 0.0153 | 0.0002   | 0.0010 | COMP   | Yes | Yes |
| DB00207 | Azithromycin                | 2465 | -0.1622 | 0.0578 | -0.2754 | -0.0489 | 0.0050 | 0.0227 | 4.3675 | 0.0034  | 0.0089 | 1.32E-05 | 0.0002 |        | Yes | No  |
| DB01120 | Gliclazide                  | 322  | -0.4172 | 0.1510 | -0.7131 | -0.1213 | 0.0057 | 0.0249 | 2.7404 | 0.0026  | 0.0155 | 0.0065   | 0.0226 |        | Yes | No  |

|         |                            |      |         |        |         |         |        |        |         |         |        |        |        |        |     |     |
|---------|----------------------------|------|---------|--------|---------|---------|--------|--------|---------|---------|--------|--------|--------|--------|-----|-----|
| DB00186 | Lorazepam                  | 1057 | -0.2300 | 0.0850 | -0.3966 | -0.0633 | 0.0068 | 0.0288 | 1.1617  | -0.0018 | 0.0071 | 0.2457 | 0.3996 |        | Yes | No  |
| DB00169 | Cholecalciferol            | 725  | -0.2807 | 0.1050 | -0.4865 | -0.0748 | 0.0075 | 0.0306 | 3.6695  | 0.0044  | 0.0144 | 0.0003 | 0.0013 | VDR    | Yes | Yes |
| DB00146 | Calcifediol                | 530  | -0.4072 | 0.1536 | -0.7083 | -0.1061 | 0.0080 | 0.0316 | 3.4011  | 0.0050  | 0.0187 | 0.0007 | 0.0033 | VDR    | Yes | Yes |
| DB01039 | Fenofibrate                | 244  | -0.5385 | 0.2052 | -0.9407 | -0.1364 | 0.0087 | 0.0331 | 1.4990  | -0.0020 | 0.0147 | 0.1351 | 0.2659 | PPARG  | Yes | Yes |
| DB01039 | Fenofibrate                | 244  | -0.5385 | 0.2052 | -0.9407 | -0.1364 | 0.0087 | 0.0331 | 1.4990  | -0.0020 | 0.0147 | 0.1351 | 0.2659 | NR112  | Yes | Yes |
| DB00503 | Ritonavir                  | 199  | -2.5672 | 1.0184 | -4.5631 | -0.5712 | 0.0117 | 0.0433 | 0.5442  | -0.0073 | 0.0130 | 0.5870 | 0.6953 | NR112  | Yes | Yes |
| DB01601 | Lopinavir                  | 185  | -2.4728 | 1.0151 | -4.4623 | -0.4833 | 0.0148 | 0.0533 | 1.0065  | -0.0051 | 0.0159 | 0.3157 | 0.4520 |        | No  | No  |
| DB01029 | Irbesartan                 | 184  | -0.4971 | 0.2119 | -0.9125 | -0.0817 | 0.0190 | 0.0662 | 0.6811  | -0.0066 | 0.0136 | 0.4962 | 0.6372 | JUN    | Yes | Yes |
| DB01029 | Irbesartan                 | 184  | -0.4971 | 0.2119 | -0.9125 | -0.0817 | 0.0190 | 0.0662 | 0.6811  | -0.0066 | 0.0136 | 0.4962 | 0.6372 | AGTR1  | Yes | Yes |
| DB09154 | Sodium citrate             | 272  | -0.4184 | 0.1802 | -0.7716 | -0.0652 | 0.0202 | 0.0670 | 0.8802  | -0.0045 | 0.0119 | 0.3795 | 0.5145 |        | No  | No  |
| DB09341 | Dextrose, unspecified form | 311  | -0.3800 | 0.1638 | -0.7010 | -0.0590 | 0.0203 | 0.0670 | 0.7544  | -0.0046 | 0.0103 | 0.4512 | 0.5967 |        | No  | No  |
| DB09038 | Empagliflozin              | 239  | -0.4238 | 0.1836 | -0.7835 | -0.0640 | 0.0210 | 0.0673 | 2.2683  | 0.0013  | 0.0171 | 0.0243 | 0.0618 |        | Yes | No  |
| DB14500 | Potassium                  | 352  | -0.3476 | 0.1524 | -0.6464 | -0.0488 | 0.0226 | 0.0691 | 0.2757  | -0.0060 | 0.0080 | 0.7830 | 0.8164 |        | No  | No  |
| DB00128 | Aspartic acid              | 648  | -0.2984 | 0.1314 | -0.5560 | -0.0409 | 0.0231 | 0.0691 | 3.6651  | 0.0054  | 0.0179 | 0.0003 | 0.0013 | ASNS   | Yes | Yes |
| DB00178 | Ramipril                   | 509  | -0.2656 | 0.1170 | -0.4949 | -0.0362 | 0.0232 | 0.0691 | 2.2942  | 0.0010  | 0.0129 | 0.0222 | 0.0602 |        | Yes | No  |
| DB09153 | Sodium chloride            | 381  | -0.2960 | 0.1385 | -0.5674 | -0.0247 | 0.0325 | 0.0944 | 0.6257  | -0.0048 | 0.0093 | 0.5319 | 0.6603 |        | No  | No  |
| DB00193 | Tramadol                   | 949  | -0.1690 | 0.0831 | -0.3319 | -0.0060 | 0.0421 | 0.1192 | 3.1635  | 0.0025  | 0.0107 | 0.0016 | 0.0064 | SLC6A4 | Yes | Yes |
| DB08906 | Fluticasone furoate        | 662  | -0.2089 | 0.1036 | -0.4120 | -0.0058 | 0.0438 | 0.1192 | 4.0096  | 0.0055  | 0.0159 | 0.0001 | 0.0007 |        | Yes | No  |
| DB01098 | Rosuvastatin               | 314  | -0.3010 | 0.1494 | -0.5939 | -0.0081 | 0.0440 | 0.1192 | 1.0299  | -0.0038 | 0.0121 | 0.3039 | 0.4423 |        | Yes | No  |
| DB01418 | Acenocoumarol              | 511  | 0.1784  | 0.0897 | 0.0025  | 0.3543  | 0.0468 | 0.1241 | -0.7458 | -0.0079 | 0.0035 | 0.4561 | 0.5967 |        | Yes | No  |
| DB13872 | Lormetazepam               | 806  | 0.1523  | 0.0779 | -0.0003 | 0.3049  | 0.0504 | 0.1289 | 0.3720  | -0.0037 | 0.0054 | 0.7100 | 0.7666 | GABRA2 | Yes | Yes |
| DB13872 | Lormetazepam               | 806  | 0.1523  | 0.0779 | -0.0003 | 0.3049  | 0.0504 | 0.1289 | 0.3720  | -0.0037 | 0.0054 | 0.7100 | 0.7666 | GABRA5 | Yes | Yes |
| DB00455 | Loratadine                 | 251  | -0.3619 | 0.1852 | -0.7249 | 0.0011  | 0.0507 | 0.1289 | 1.3378  | -0.0029 | 0.0155 | 0.1817 | 0.3309 | HRH1   | Yes | Yes |
| DB00654 | Latanoprost                | 183  | 0.2849  | 0.1475 | -0.0042 | 0.5740  | 0.0534 | 0.1329 | -0.9337 | -0.0143 | 0.0048 | 0.3521 | 0.4827 |        | Yes | No  |
| DB00537 | Ciprofloxacin              | 353  | 0.2213  | 0.1151 | -0.0042 | 0.4468  | 0.0545 | 0.1329 | 1.0522  | -0.0035 | 0.0117 | 0.2934 | 0.4419 |        | Yes | No  |
| DB01126 | Dutasteride                | 547  | 0.1649  | 0.0881 | -0.0078 | 0.3377  | 0.0613 | 0.1467 | 1.4243  | -0.0014 | 0.0088 | 0.1549 | 0.3000 | SRD5A1 | Yes | Yes |
| DB00656 | Trazodone                  | 468  | 0.1784  | 0.0965 | -0.0109 | 0.3676  | 0.0647 | 0.1499 | 0.2636  | -0.0053 | 0.0070 | 0.7922 | 0.8191 | HRH1   | Yes | Yes |
| DB00656 | Trazodone                  | 468  | 0.1784  | 0.0965 | -0.0109 | 0.3676  | 0.0647 | 0.1499 | 0.2636  | -0.0053 | 0.0070 | 0.7922 | 0.8191 | SLC6A4 | Yes | Yes |

|         |                       |      |         |        |         |        |        |        |         |         |        |          |        |        |     |     |
|---------|-----------------------|------|---------|--------|---------|--------|--------|--------|---------|---------|--------|----------|--------|--------|-----|-----|
| DB01306 | Insulin aspart        | 214  | -0.3385 | 0.1835 | -0.6981 | 0.0212 | 0.0651 | 0.1499 | 2.0462  | 0.0004  | 0.0186 | 0.0420   | 0.1004 |        | Yes | No  |
| DB06292 | Dapagliflozin         | 229  | -0.3537 | 0.1933 | -0.7326 | 0.0251 | 0.0672 | 0.1519 | 2.5051  | 0.0024  | 0.0194 | 0.0131   | 0.0410 |        | Yes | No  |
| DB00727 | Nitroglycerin         | 359  | 0.2059  | 0.1136 | -0.0168 | 0.4286 | 0.0700 | 0.1553 | -1.2818 | -0.0115 | 0.0024 | 0.2011   | 0.3555 |        | Yes | No  |
| DB00736 | Esomeprazole          | 277  | -0.2659 | 0.1573 | -0.5743 | 0.0425 | 0.0911 | 0.1984 | 1.5575  | -0.0018 | 0.0158 | 0.1204   | 0.2408 |        | Yes | No  |
| DB00678 | Losartan              | 1409 | -0.1090 | 0.0665 | -0.2393 | 0.0213 | 0.1011 | 0.2165 | 3.9044  | 0.0033  | 0.0099 | 0.0001   | 0.0007 | AGTR1  | Yes | Yes |
| DB00335 | Atenolol              | 187  | -0.3154 | 0.1935 | -0.6946 | 0.0639 | 0.1031 | 0.2170 | -0.6043 | -0.0126 | 0.0067 | 0.5464   | 0.6666 |        | Yes | No  |
| DB00796 | Candesartan cilexetil | 198  | -0.3031 | 0.1952 | -0.6856 | 0.0794 | 0.1204 | 0.2489 | 2.5196  | 0.0031  | 0.0246 | 0.0126   | 0.0405 | AGTR1  | Yes | Yes |
| DB08882 | Linagliptin           | 306  | 0.1743  | 0.1170 | -0.0550 | 0.4037 | 0.1362 | 0.2690 | -0.4302 | -0.0092 | 0.0059 | 0.6673   | 0.7609 | DPP4   | Yes | Yes |
| DB09214 | Dexketoprofen         | 327  | -0.2547 | 0.1710 | -0.5899 | 0.0805 | 0.1364 | 0.2690 | 1.0284  | -0.0043 | 0.0137 | 0.3045   | 0.4423 | PTGS2  | Yes | Yes |
| DB00451 | Levothyroxine         | 396  | -0.2245 | 0.1509 | -0.5202 | 0.0712 | 0.1367 | 0.2690 | 2.2650  | 0.0011  | 0.0152 | 0.0241   | 0.0618 | THRB   | Yes | Yes |
| DB00373 | Timolol               | 254  | -0.2166 | 0.1475 | -0.5057 | 0.0725 | 0.1421 | 0.2751 | -0.3720 | -0.0118 | 0.0081 | 0.7100   | 0.7666 |        | Yes | No  |
| DB00047 | Insulin glargine      | 565  | -0.1516 | 0.1044 | -0.3562 | 0.0529 | 0.1463 | 0.2789 | 1.1004  | -0.0023 | 0.0082 | 0.2716   | 0.4195 |        | Yes | No  |
| DB00986 | Glycopyrronium        | 196  | 0.2022  | 0.1423 | -0.0768 | 0.4812 | 0.1555 | 0.2919 | 0.4003  | -0.0078 | 0.0118 | 0.6894   | 0.7666 |        | Yes | No  |
| DB00788 | Naproxen              | 223  | -0.2915 | 0.2101 | -0.7032 | 0.1202 | 0.1653 | 0.3055 | 3.2195  | 0.0059  | 0.0243 | 0.0015   | 0.0063 | PTGS2  | Yes | Yes |
| DB09082 | Vilanterol            | 328  | -0.2052 | 0.1492 | -0.4975 | 0.0872 | 0.1690 | 0.3078 | 2.2803  | 0.0012  | 0.0165 | 0.0234   | 0.0618 |        | Yes | No  |
| DB00813 | Fentanyl              | 251  | 0.1688  | 0.1263 | -0.0787 | 0.4163 | 0.1812 | 0.3252 | 0.1296  | -0.0083 | 0.0095 | 0.8970   | 0.9119 |        | Yes | No  |
| DB00590 | Doxazosin             | 428  | -0.1451 | 0.1128 | -0.3662 | 0.0761 | 0.1985 | 0.3510 | 1.0916  | -0.0027 | 0.0095 | 0.2755   | 0.4202 |        | Yes | No  |
| DB04817 | Metamizole            | 2843 | -0.0640 | 0.0507 | -0.1635 | 0.0355 | 0.2072 | 0.3612 | 4.0654  | 0.0027  | 0.0076 | 4.93E-05 | 0.0005 |        | No  | No  |
| DB00973 | Ezetimibe             | 344  | -0.1615 | 0.1308 | -0.4178 | 0.0947 | 0.2166 | 0.3723 | 1.8670  | -0.0004 | 0.0163 | 0.0626   | 0.1444 | SOAT1  | Yes | Yes |
| DB00448 | Lansoprazole          | 236  | -0.1829 | 0.1510 | -0.4789 | 0.1131 | 0.2258 | 0.3825 | -0.3278 | -0.0101 | 0.0072 | 0.7434   | 0.7886 |        | Yes | No  |
| DB01175 | Escitalopram          | 175  | 0.2005  | 0.1673 | -0.1273 | 0.5283 | 0.2307 | 0.3855 | 2.8917  | 0.0055  | 0.0289 | 0.0044   | 0.0161 | HRH1   | Yes | Yes |
| DB01175 | Escitalopram          | 175  | 0.2005  | 0.1673 | -0.1273 | 0.5283 | 0.2307 | 0.3855 | 2.8917  | 0.0055  | 0.0289 | 0.0044   | 0.0161 | SLC6A4 | Yes | Yes |
| DB01076 | Atorvastatin          | 1112 | -0.0845 | 0.0735 | -0.2286 | 0.0597 | 0.2507 | 0.4089 | 1.1407  | -0.0016 | 0.0062 | 0.2543   | 0.4029 | DPP4   | Yes | Yes |
| DB00927 | Famotidine            | 207  | -0.1926 | 0.1679 | -0.5218 | 0.1365 | 0.2514 | 0.4089 | 0.5732  | -0.0072 | 0.0132 | 0.5670   | 0.6849 |        | Yes | No  |
| DB01001 | Salbutamol            | 670  | -0.1196 | 0.1097 | -0.3346 | 0.0953 | 0.2753 | 0.4419 | 3.9062  | 0.0057  | 0.0171 | 0.0001   | 0.0007 |        | Yes | No  |
| DB00421 | Spirolactone          | 272  | 0.1233  | 0.1237 | -0.1191 | 0.3657 | 0.3189 | 0.5023 | 0.4487  | -0.0051 | 0.0081 | 0.6540   | 0.7599 | NR112  | Yes | Yes |
| DB00421 | Spirolactone          | 272  | 0.1233  | 0.1237 | -0.1191 | 0.3657 | 0.3189 | 0.5023 | 0.4487  | -0.0051 | 0.0081 | 0.6540   | 0.7599 | CACNG1 | Yes | Yes |
| DB01558 | Bromazepam            | 471  | -0.1147 | 0.1156 | -0.3413 | 0.1119 | 0.3211 | 0.5023 | 2.7179  | 0.0023  | 0.0145 | 0.0068   | 0.0231 | GABRA2 | Yes | Yes |

|         |                 |      |         |        |         |        |        |        |         |         |        |          |          |        |     |     |
|---------|-----------------|------|---------|--------|---------|--------|--------|--------|---------|---------|--------|----------|----------|--------|-----|-----|
| DB01558 | Bromazepam      | 471  | -0.1147 | 0.1156 | -0.3413 | 0.1119 | 0.3211 | 0.5023 | 2.7179  | 0.0023  | 0.0145 | 0.0068   | 0.0231   | GABRA5 | Yes | Yes |
| DB01558 | Bromazepam      | 471  | -0.1147 | 0.1156 | -0.3413 | 0.1119 | 0.3211 | 0.5023 | 2.7179  | 0.0023  | 0.0145 | 0.0068   | 0.0231   | GABRA6 | Yes | Yes |
| DB01558 | Bromazepam      | 471  | -0.1147 | 0.1156 | -0.3413 | 0.1119 | 0.3211 | 0.5023 | 2.7179  | 0.0023  | 0.0145 | 0.0068   | 0.0231   | GABRD  | Yes | Yes |
| DB01592 | Iron            | 959  | 0.0757  | 0.0774 | -0.0759 | 0.2274 | 0.3275 | 0.5058 | -1.3404 | -0.0079 | 0.0015 | 0.1805   | 0.3309   | FEN1   | Yes | Yes |
| DB00215 | Citalopram      | 300  | -0.1365 | 0.1427 | -0.4162 | 0.1433 | 0.3391 | 0.5126 | 2.8528  | 0.0036  | 0.0197 | 0.0046   | 0.0167   | HRH1   | Yes | Yes |
| DB00215 | Citalopram      | 300  | -0.1365 | 0.1427 | -0.4162 | 0.1433 | 0.3391 | 0.5126 | 2.8528  | 0.0036  | 0.0197 | 0.0046   | 0.0167   | SLC6A4 | Yes | Yes |
| DB00177 | Valsartan       | 383  | -0.1236 | 0.1296 | -0.3777 | 0.1305 | 0.3403 | 0.5126 | 1.8581  | -0.0003 | 0.0126 | 0.0639   | 0.1444   | AGTR1  | Yes | Yes |
| DB01184 | Domperidone     | 226  | 0.1325  | 0.1483 | -0.1581 | 0.4231 | 0.3715 | 0.5527 | 1.6460  | -0.0015 | 0.0174 | 0.1010   | 0.2088   |        | Yes | No  |
| DB00828 | Fosfomycin      | 298  | -0.1253 | 0.1462 | -0.4118 | 0.1612 | 0.3913 | 0.5751 | 0.5452  | -0.0053 | 0.0094 | 0.5862   | 0.6953   |        | No  | No  |
| DB04876 | Vildagliptin    | 200  | -0.1319 | 0.1611 | -0.4476 | 0.1838 | 0.4129 | 0.5996 | 2.3836  | 0.0018  | 0.0181 | 0.0180   | 0.0500   | DPP4   | Yes | Yes |
| DB09238 | Manidipine      | 160  | -0.1399 | 0.1886 | -0.5095 | 0.2297 | 0.4583 | 0.6578 | -0.3434 | -0.0119 | 0.0084 | 0.7317   | 0.7831   |        | Yes | No  |
| DB00437 | Allopurinol     | 511  | -0.0686 | 0.1010 | -0.2666 | 0.1295 | 0.4974 | 0.7056 | -0.6197 | -0.0067 | 0.0035 | 0.5358   | 0.6603   |        | Yes | No  |
| DB11921 | Deflazacort     | 629  | -0.0655 | 0.1022 | -0.2658 | 0.1348 | 0.5216 | 0.7250 | 3.8284  | 0.0052  | 0.0162 | 0.0001   | 0.0009   |        | Yes | No  |
| DB00612 | Bisoprolol      | 1409 | 0.0395  | 0.0619 | -0.0817 | 0.1608 | 0.5230 | 0.7250 | 0.4544  | -0.0026 | 0.0042 | 0.6496   | 0.7599   |        | Yes | No  |
| DB00966 | Telmisartan     | 226  | -0.0961 | 0.1565 | -0.4030 | 0.2107 | 0.5392 | 0.7363 | 1.2578  | -0.0031 | 0.0141 | 0.2099   | 0.3652   | PPARG  | Yes | Yes |
| DB00966 | Telmisartan     | 226  | -0.0961 | 0.1565 | -0.4030 | 0.2107 | 0.5392 | 0.7363 | 1.2578  | -0.0031 | 0.0141 | 0.2099   | 0.3652   | AGTR1  | Yes | Yes |
| DB00646 | Nystatin        | 165  | -0.1252 | 0.2059 | -0.5287 | 0.2784 | 0.5432 | 0.7363 | -1.1110 | -0.0193 | 0.0054 | 0.2679   | 0.4190   |        | No  | No  |
| DB06228 | Rivaroxaban     | 200  | -0.0944 | 0.1629 | -0.4137 | 0.2250 | 0.5625 | 0.7541 | 0.7740  | -0.0058 | 0.0134 | 0.4399   | 0.5897   |        | Yes | No  |
| DB00332 | Ipratropium     | 1322 | -0.0410 | 0.0748 | -0.1876 | 0.1056 | 0.5834 | 0.7736 | 5.0385  | 0.0063  | 0.0144 | 5.53E-07 | 8.44E-06 |        | Yes | No  |
| DB00214 | Torasemide      | 278  | 0.0708  | 0.1323 | -0.1886 | 0.3302 | 0.5927 | 0.7775 | 1.2194  | -0.0030 | 0.0127 | 0.2238   | 0.3735   |        | Yes | No  |
| DB01137 | Levofloxacin    | 1052 | 0.0380  | 0.0749 | -0.1089 | 0.1848 | 0.6124 | 0.7859 | 3.7623  | 0.0039  | 0.0124 | 0.0002   | 0.0010   |        | Yes | No  |
| DB00213 | Pantoprazole    | 476  | 0.0516  | 0.1036 | -0.1515 | 0.2546 | 0.6187 | 0.7859 | 1.7043  | -0.0008 | 0.0113 | 0.0890   | 0.1873   |        | Yes | No  |
| DB00440 | Trimethoprim    | 161  | -0.1046 | 0.2113 | -0.5187 | 0.3095 | 0.6206 | 0.7859 | 2.4377  | 0.0028  | 0.0254 | 0.0157   | 0.0480   |        | Yes | No  |
| DB00630 | Alendronic acid | 172  | -0.0888 | 0.1817 | -0.4450 | 0.2673 | 0.6248 | 0.7859 | 1.2955  | -0.0039 | 0.0192 | 0.1968   | 0.3532   |        | Yes | No  |
| DB01112 | Cefuroxime      | 352  | 0.0628  | 0.1319 | -0.1956 | 0.3213 | 0.6338 | 0.7890 | 1.2115  | -0.0028 | 0.0119 | 0.2265   | 0.3735   |        | No  | No  |
| DB01233 | Metoclopramide  | 498  | 0.0565  | 0.1234 | -0.1854 | 0.2983 | 0.6473 | 0.7977 | 2.3802  | 0.0014  | 0.0150 | 0.0177   | 0.0500   | HTR4   | Yes | Yes |
| DB00758 | Clopidogrel     | 285  | 0.0539  | 0.1283 | -0.1975 | 0.3053 | 0.6745 | 0.8155 | -0.3938 | -0.0083 | 0.0055 | 0.6940   | 0.7666   |        | Yes | No  |
| DB01068 | Clonazepam      | 167  | 0.0751  | 0.1792 | -0.2761 | 0.4263 | 0.6751 | 0.8155 | -0.1190 | -0.0123 | 0.0109 | 0.9054   | 0.9129   | NR112  | Yes | Yes |

|         |                 |      |         |        |         |        |        |        |         |         |        |        |        |        |     |     |
|---------|-----------------|------|---------|--------|---------|--------|--------|--------|---------|---------|--------|--------|--------|--------|-----|-----|
| DB00766 | Clavulanic acid | 779  | 0.0367  | 0.0908 | -0.1413 | 0.2146 | 0.6864 | 0.8209 | 1.0387  | -0.0026 | 0.0083 | 0.2995 | 0.4423 |        | No  | No  |
| DB00230 | Pregabalin      | 382  | 0.0402  | 0.1138 | -0.1828 | 0.2632 | 0.7240 | 0.8575 | -0.3773 | -0.0077 | 0.0052 | 0.7061 | 0.7666 |        | Yes | No  |
| DB00370 | Mirtazapine     | 201  | 0.0522  | 0.1522 | -0.2460 | 0.3504 | 0.7317 | 0.8583 | -0.3812 | -0.0104 | 0.0070 | 0.7035 | 0.7666 | HRH1   | Yes | Yes |
| DB00502 | Haloperidol     | 206  | 0.0380  | 0.1436 | -0.2435 | 0.3194 | 0.7913 | 0.9113 | 1.8544  | -0.0004 | 0.0153 | 0.0651 | 0.1444 |        | Yes | No  |
| DB01136 | Carvedilol      | 370  | -0.0309 | 0.1172 | -0.2605 | 0.1987 | 0.7918 | 0.9113 | -0.9917 | -0.0092 | 0.0030 | 0.3220 | 0.4520 | HIF1A  | Yes | Yes |
| DB00628 | Clorazepic acid | 330  | -0.0323 | 0.1286 | -0.2843 | 0.2198 | 0.8018 | 0.9142 | 0.6315  | -0.0048 | 0.0093 | 0.5282 | 0.6603 |        | Yes | No  |
| DB08810 | Cinitapride     | 210  | -0.0410 | 0.1783 | -0.3905 | 0.3084 | 0.8180 | 0.9240 | 2.4107  | 0.0022  | 0.0210 | 0.0168 | 0.0500 |        | No  | No  |
| DB14761 | Remdesivir      | 190  | -0.0396 | 0.2061 | -0.4435 | 0.3643 | 0.8477 | 0.9488 | 1.5787  | -0.0018 | 0.0161 | 0.1160 | 0.2359 |        | No  | No  |
| DB01409 | Tiotropium      | 449  | -0.0191 | 0.1091 | -0.2330 | 0.1947 | 0.8607 | 0.9546 | 0.4313  | -0.0048 | 0.0075 | 0.6665 | 0.7609 |        | Yes | No  |
| DB00715 | Paroxetine      | 174  | -0.0290 | 0.1960 | -0.4131 | 0.3552 | 0.8825 | 0.9571 | 1.2141  | -0.0037 | 0.0160 | 0.2263 | 0.3735 | SLC6A4 | Yes | Yes |
| DB00158 | Folic acid      | 624  | -0.0149 | 0.1022 | -0.2152 | 0.1855 | 0.8843 | 0.9571 | -0.6695 | -0.0080 | 0.0039 | 0.5035 | 0.6398 | FOLR1  | Yes | Yes |
| DB06605 | Apixaban        | 345  | -0.0161 | 0.1184 | -0.2482 | 0.2160 | 0.8919 | 0.9571 | 0.7404  | -0.0043 | 0.0095 | 0.4598 | 0.5967 |        | Yes | No  |
| DB06698 | Betahistine     | 409  | -0.0153 | 0.1154 | -0.2415 | 0.2109 | 0.8944 | 0.9571 | 1.3829  | -0.0019 | 0.0109 | 0.1675 | 0.3145 | HRH1   | Yes | Yes |
| DB00806 | Pentoxifylline  | 231  | -0.0155 | 0.1376 | -0.2852 | 0.2542 | 0.9104 | 0.9658 | -0.2132 | -0.0088 | 0.0071 | 0.8314 | 0.8523 | NT5E   | Yes | Yes |
| DB00425 | Zolpidem        | 292  | -0.0095 | 0.1360 | -0.2760 | 0.2569 | 0.9441 | 0.9760 | 1.8193  | -0.0006 | 0.0146 | 0.0704 | 0.1533 | GABRA2 | Yes | Yes |
| DB01060 | Amoxicillin     | 1090 | 0.0052  | 0.0779 | -0.1475 | 0.1578 | 0.9472 | 0.9760 | 1.2477  | -0.0015 | 0.0068 | 0.2125 | 0.3652 |        | No  | No  |
| DB00404 | Alprazolam      | 557  | -0.0058 | 0.1044 | -0.2105 | 0.1989 | 0.9558 | 0.9760 | 3.2861  | 0.0037  | 0.0145 | 0.0011 | 0.0046 | GABRA2 | Yes | Yes |
| DB00404 | Alprazolam      | 557  | -0.0058 | 0.1044 | -0.2105 | 0.1989 | 0.9558 | 0.9760 | 3.2861  | 0.0037  | 0.0145 | 0.0011 | 0.0046 | GABRA5 | Yes | Yes |
| DB00404 | Alprazolam      | 557  | -0.0058 | 0.1044 | -0.2105 | 0.1989 | 0.9558 | 0.9760 | 3.2861  | 0.0037  | 0.0145 | 0.0011 | 0.0046 | GABRA6 | Yes | Yes |
| DB00321 | Amitriptyline   | 162  | 0.0088  | 0.1867 | -0.3571 | 0.3747 | 0.9623 | 0.9760 | 1.7201  | -0.0013 | 0.0194 | 0.0875 | 0.1872 | NTRK1  | Yes | Yes |
| DB00321 | Amitriptyline   | 162  | 0.0088  | 0.1867 | -0.3571 | 0.3747 | 0.9623 | 0.9760 | 1.7201  | -0.0013 | 0.0194 | 0.0875 | 0.1872 | HTR1B  | Yes | Yes |
| DB00321 | Amitriptyline   | 162  | 0.0088  | 0.1867 | -0.3571 | 0.3747 | 0.9623 | 0.9760 | 1.7201  | -0.0013 | 0.0194 | 0.0875 | 0.1872 | HRH1   | Yes | Yes |
| DB00321 | Amitriptyline   | 162  | 0.0088  | 0.1867 | -0.3571 | 0.3747 | 0.9623 | 0.9760 | 1.7201  | -0.0013 | 0.0194 | 0.0875 | 0.1872 | SLC6A4 | Yes | Yes |
| DB00115 | Cyanocobalamin  | 400  | -0.0056 | 0.1412 | -0.2824 | 0.2712 | 0.9685 | 0.9760 | 0.0728  | -0.0084 | 0.0090 | 0.9420 | 0.9420 |        | Yes | No  |
| DB00938 | Salmeterol      | 279  | 0.0048  | 0.1348 | -0.2594 | 0.2690 | 0.9715 | 0.9760 | 1.1509  | -0.0035 | 0.0135 | 0.2507 | 0.4025 |        | Yes | No  |
| DB01104 | Sertraline      | 359  | -0.0037 | 0.1213 | -0.2415 | 0.2342 | 0.9760 | 0.9760 | 2.9841  | 0.0036  | 0.0175 | 0.0030 | 0.0116 | SLC6A4 | Yes | Yes |
